# Supplementary material
Source: HighWire-hosted journal article supplement (https://erj.ersjournals.com/content/58/2/2004146)
Supplement: inline-supplementary-material-1 [file inline-supplementary-material-1.pdf]

## **ONLINE SUPPLEMENTARY DATA**

### **Exercise Training in Chronic Obstructive Pulmonary Disease:**

#### **Muscle O<sub>2</sub> Transport Plasticity**

Ryan M. Broxterman, Peter D. Wagner, and Russell S. Richardson

### **Vastus lateralis morphometry in patients with COPD pre- and post-training.**

Five of the patients with COPD also underwent percutaneous needle biopsies of the vastus lateralis, as previously described [1]. These patients exhibited predominantly type II fibers and a, relative, scarcity of type I fibers pre-training. Fiber type distributions, capillary density, capillary-to-fiber ratio, and number of capillaries around a fiber were not significantly changed by training. However, citrate synthase activity was increased by ~55% following KE training in these patients (Table S1).

**Table S1. Vastus Lateralis Morphometry in Patients with COPD Pre and Post Knee-Extensor Exercise Training**

|                                                  | <b>COPD</b> |             |
|--------------------------------------------------|-------------|-------------|
|                                                  | PRE         | POST        |
| Type I fibers (area%)                            | 26 ± 9      | 33 ± 7      |
| Type II fibers (area%)                           | 71 ± 10     | 62 ± 6      |
| Capillary density (capillaries/mm <sup>2</sup> ) | 555 ± 94    | 500 ± 60    |
| Capillary-to-fiber ratio                         | 1.47 ± 0.16 | 1.76 ± 0.15 |
| Number of capillaries around a fiber             | 3.93 ± 0.42 | 4.18 ± 0.28 |
| Mitochondrial volume density                     | 5.0 ± 0.3   | 5.2 ± 0.7   |
| Citrate synthase activity                        | 8.2 ± 1.5   | 12.7 ± 1.7* |

Values reported as mean ± SEM. COPD, n=5. \* p<0.05 versus pre-training.

### **Reference**

1. Richardson RS, Leek BT, Gavin TP, Haseler LJ, Mudaliar SR, Henry R, Mathieu-Costello O, Wagner PD. Reduced mechanical efficiency in chronic obstructive pulmonary disease but normal peak VO<sub>2</sub> with small muscle mass exercise. *Am J Respir Crit Care Med* 2004; 169(1): 89-96.
